# Supplementary material for: Sporotrichosis in Older Adults: A Cohort Study of 911 Patients from a Hyperendemic Area of Zoonotic Transmission in Rio de Janeiro, Brazil
Source: MDPI journal article supplement (doi:10.3390/jof9080804), 2023-07-30
Supplement: s1 [file s1]

Table S1. Comorbidities of older patients with sporotrichosis treated at INI/FIOCRUZ (1999-2020)

| <b>Comorbidities</b>                                | <b>Frequency</b> | <b>Percentage</b> |
|-----------------------------------------------------|------------------|-------------------|
| <b>Systemic arterial hypertension</b>               | 478              | 75.2              |
| <b>Diabetes mellitus</b>                            | 163              | 25.6              |
| <b>Dyslipidemia/metabolic changes</b>               | 48               | 7.5               |
| <b>Cardiovascular diseases <sup>1</sup></b>         | 46               | 7.2               |
| <b>Arthrosis/osteoporosis</b>                       | 34               | 5.3               |
| <b>Neuropsychiatric diseases <sup>2</sup></b>       | 32               | 5.0               |
| <b>Gastrointestinal diseases <sup>3</sup></b>       | 23               | 3.6               |
| <b>Hypothyroidism</b>                               | 23               | 3.6               |
| <b>Nephropathy/uropathies <sup>4</sup></b>          | 19               | 3.0               |
| <b>Chronic obstructive pulmonary disease/asthma</b> | 18               | 2.8               |
| <b>Glaucoma</b>                                     | 17               | 2.7               |
| <b>Chronic venous/lymphatic insufficiency</b>       | 12               | 1.9               |
| <b>Neoplasms <sup>5</sup></b>                       | 10               | 1.6               |
| <b>Infectious diseases <sup>6</sup></b>             | 7                | 1.1               |
| <b>Lupus erythematosus/rheumatoid arthritis</b>     | 6                | 0.9               |
| <b>Alcoholism</b>                                   | 5                | 0.8               |
| <b>Haematological diseases <sup>7</sup></b>         | 5                | 0.8               |
| <b>Skin diseases <sup>8</sup></b>                   | 3                | 0.5               |

<sup>1</sup> Coronary disease, heart failure, arrhythmia, heart disease. <sup>2</sup> Anxiety, convulsions, depression, psychiatric disease, Parkinson's disease. <sup>3</sup> Gastroesophageal reflux disease, cirrhosis, gastritis, peptic ulcer. <sup>4</sup> Chronic renal failure, nephrolithiasis, benign prostatic hyperplasia. <sup>5</sup> Cervical cancer, breast cancer, prostate cancer. <sup>6</sup> Chagas disease, human immunodeficiency virus infection, human T-cell lymphotropic virus infection, hepatitis C virus infection. <sup>7</sup> Myeloid leukemia, idiopathic thrombocytopenic purpura. <sup>8</sup> Neurofibromatosis, psoriasis, vitiligo. Missing = 38.
